# Supplementary material
Source: publisher figshare collection journal article supplement (https://frontiersin.figshare.com/ndownloader/files/28927446)
Supplement: Supplementary file [file 28927446]

### Supplementary Table S5

#### Machine learning performance measures for predicting the presence of transmembrane domains

| Performance measures (%)  | adaBoost | RF           | Ensemble |
|---------------------------|----------|--------------|----------|
| Accuracy                  | 72.91    | <b>76.25</b> | 73.65    |
| Error Rate                | 27.09    | <b>23.75</b> | 26.35    |
| Sensitivity               | 71.06    | <b>72.73</b> | 71.61    |
| False Positive Rate       | 25.23    | <b>20.22</b> | 24.30    |
| Specificity               | 74.77    | <b>79.78</b> | 75.70    |
| Positive Predictive Value | 73.80    | <b>78.24</b> | 74.66    |
| Negative Predictive Value | 72.09    | <b>74.52</b> | 72.73    |

Values in bold indicate best performances.

adaBoost = adaptive boosting; RF = Random Forest ; Ensemble = final classifications derived from the average of adaBoost and RF classification probabilities.
